# Supplementary material
Source: publisher figshare collection journal article supplement (https://frontiersin.figshare.com/ndownloader/files/13848458)
Supplement: Supplementary file [file 13848458]

## Supplementary Tables

**Table S1.** Horseradish peroxidase (HRP)-labelled oligonucleotide probes used for CARD-FISH. Helper and competitor oligonucleotides were not labelled.

| Probe                  | Specificity                                                                                                      | Sequence (5'-3')                                               | FA (%) | Reference                                                |
|------------------------|------------------------------------------------------------------------------------------------------------------|----------------------------------------------------------------|--------|----------------------------------------------------------|
| EUB I-III              | most Bacteria                                                                                                    | GCWGCCWCCCGTAGGWT                                              | 35     | Amann <i>et al.</i> (1990)<br>Daims <i>et al.</i> (1999) |
| NON338                 | Negative control                                                                                                 | ACTCCTACGGGAGGCAGC                                             |        | Wallner <i>et al.</i> (1993)                             |
| GAM42a*                | most <i>Gammaproteobacteria</i>                                                                                  | GCCTTCCCACATCGTTT                                              | 35     | Manz <i>et al.</i> (1992)                                |
| ROS537                 | <i>Roseobacter</i> -clade bacteria (RCB)                                                                         | CAACGCTAACCCCTCC                                               | 35     | Eilers <i>et al.</i> (2000)                              |
| DSS658                 | many marine<br><i>Desulfobacteraceae</i> including<br>the <i>Desulfosarcina</i> /<br><i>Desulfococcus</i> -group | TCCACTTCCCTCTCCAT                                              | 50     | Manz <i>et al.</i> (1998)                                |
| DSB706                 | many marine<br><i>Desulfobulbaceae</i>                                                                           | ACCGGTATTCCTCCCGAT                                             | 40     | Loy <i>et al.</i> (2002)                                 |
| Delta495 a-c*          | most <i>Deltaproteobacteria</i>                                                                                  | AGTTAGCCGGTGCTTCCT<br>AGTTAGCCGGCGCTTCCT<br>AATTAGCCGGTGCTTCCT | 35     | Lücker <i>et al.</i> (2007)                              |
| DSS1431*               | subgroup of Sva0081-MBG                                                                                          | GGTTTGCCCAACGACTTC                                             | 30     | This study                                               |
| cDSS1431a <sup>†</sup> | Competitor to probe DSS1431                                                                                      | GGTTTGCCCAACAACCTTC                                            | 30     | This study                                               |
| cDSS1431b <sup>†</sup> | Competitor to probe DSS1431                                                                                      | GGTTAGCCCAACAACCTTC                                            | 30     | This study                                               |
| cDSS1431c <sup>†</sup> | Competitor to probe DSS1431                                                                                      | GGTTGCGCCACCAACCTTC                                            | 30     | This study                                               |
| cDSS1431d <sup>†</sup> | Competitor to probe DSS1431                                                                                      | AGTTTGCCCAACAACCTTC                                            | 30     | This study                                               |
| cDSS1431e <sup>†</sup> | Competitor to probe DSS1431                                                                                      | GGTTGCGCCCAACAACCTTC                                           | 30     | This study                                               |
| DSS1431us <sup>‡</sup> | Helper to probe DSS1431                                                                                          | TGGTACAACCAACTCTCATGG                                          | 30     | This study                                               |
| DSS1431us <sup>‡</sup> | Helper to probe DSS1431                                                                                          | TTAGGCGCCTGCATCCCCGAA                                          | 30     | This study                                               |
| DSS1431us <sup>‡</sup> | Helper to probe DSS1431                                                                                          | TTAGGCGCCTGCATCCTGTAAA                                         | 30     | This study                                               |

FA, formamide; \* probes were used with published competitors; <sup>†</sup> competitor oligonucleotide; <sup>‡</sup> helper oligonucleotide

**Table S2.** Relative abundances of  $^{14}\text{C}$ -acetate-assimilating cells as determined by microautoradiography and DAPI staining or hybridization with specific CARD-FISH probes in duplicate whole sediment cores incubated with  $^{14}\text{C}$ -acetate.

| Sorted population                        | % of all<br>MAR-positive cells<br>(core A/B) | % MAR-positive<br>of hybridized cells<br>(core A/B) |
|------------------------------------------|----------------------------------------------|-----------------------------------------------------|
| <i>Gammaproteobacteria</i>               | 59/61                                        | 19/19                                               |
| <i>Roseobacter</i> -clade bacteria (RCB) | 6/8                                          | 48/32                                               |
| <i>Deltaproteobacteria</i>               | 8/4                                          | 9/7                                                 |

**Table S3.** Average cell-specific  $^{14}\text{C}$ -acetate assimilation rates of flow-sorted populations from duplicate whole core and slurry incubations. Cells were either labelled by CARD-FISH (16S rRNA) or by Nile Red-staining (polyhydroxyalkanoate, PHA).

| Sample type                | Cell-specific assimilation rates (fg C cell <sup>-1</sup> d <sup>-1</sup> ) |                       |         |                                      |                               |         | PHA*<br>(min-max) |
|----------------------------|-----------------------------------------------------------------------------|-----------------------|---------|--------------------------------------|-------------------------------|---------|-------------------|
|                            | <i>Bacteria</i>                                                             | <i>Gamma-proteob.</i> | RCB     | <i>Desulfobacteraceae</i><br>Sva0081 | <i>Desulfo-<br/>bulbaceae</i> |         |                   |
| core incubations<br>A/B:   |                                                                             |                       |         |                                      |                               |         |                   |
| 0-1 cm                     | 3.8/1.3                                                                     | 5.5/3.9               | 9.7/7.8 | 3.3/2.5                              | n.d.                          | 4.9/7.1 |                   |
| 2-3 cm                     | 0.2/0.3                                                                     | 0.6/0.8               | 0.1/1.3 | 0.9/0.6                              | n.d.                          | 1.3/3.0 |                   |
| 6-7 cm                     | 0.2/0.2                                                                     | 0.3/0.2               | 0.4/0.5 | 0.3/0.2                              | n.d.                          | 0.8/1.6 |                   |
| slurry incubations<br>A/B: |                                                                             |                       |         |                                      |                               |         |                   |
| oxic                       | 3.5/5.8                                                                     | 11.9/17.6             | 3.8/5.3 | 1.1/1.2                              | 2.7/2.8                       | 2.5/3.0 | 1-26              |
| anoxic                     | n.d.                                                                        | n.d.                  | n.d.    | n.d.                                 | n.d.                          | n.d.    | 1-20              |

n.d., not determined; \* polyhydroxyalkanoates stained with Nile red

## References:

- Amann, R.I., Binder, B.J., Olson, R.J., Chisholm, S.W., Devereux, R., and Stahl, D.A. (1990) Combination of 16S rRNA-targeted oligonucleotide probes with flow cytometry for analyzing mixed microbial populations. *Appl. Environ. Microbiol.* 56: 1919–1925.
- Daims, H., Brühl, A., Amann, R., Schleifer, K.H., and Wagner, M. (1999) The domain-specific probe EUB338 is insufficient for the detection of all *Bacteria*: development and evaluation of a more comprehensive probe set. *Syst. Appl. Microbiol.* 22: 434–444.

- Eilers, H., Pernthaler, J., Glöckner, F.O., and Amann, R. (2000) Culturability and *in situ* abundance of pelagic bacteria from the North Sea. *Appl. Environ. Microbiol.* 66: 3044–3051.
- Loy, A., Lehner, A., Lee, N., Adamczyk, J., Meier, H., Ernst, J., *et al.* (2002) Oligonucleotide microarray for 16S rRNA gene-based detection of all recognized lineages of sulfate-reducing prokaryotes in the environment. *Appl. Environ. Microbiol.* 68: 5064–5081.
- Lücker, S., Steger, D., Kjeldsen, K.U., MacGregor, B.J., Wagner, M., and Loy, A. (2007) Improved 16S rRNA-targeted probe set for analysis of sulfate-reducing bacteria by fluorescence *in situ* hybridization. *J. Microbiol. Methods* 69: 523–528.
- Manz, W., Amann, R., Ludwig, W., Wagner, M., and Schleifer, K.-H. (1992) Phylogenetic oligodeoxynucleotide probes for the major subclasses of *Proteobacteria*: problems and solutions. *Syst. Appl. Microbiol.* 15: 593–600.
- Manz, W., Eisenbrecher, M., Neu, T.R., and Szewzyk, U. (1998) Abundance and spatial organization of Gram-negative sulfate-reducing bacteria in activated sludge investigated by *in situ* probing with specific 16S rRNA targeted oligonucleotides. *FEMS Microbiol. Ecol.* 25: 43–61.
- Wallner, G., Amann, R., and Beisker, W. (1993) Optimizing fluorescent *in situ* hybridization with rRNA-targeted oligonucleotide probes for flow cytometric identification of microorganisms. *Cytometry* 14: 136–143.
